# Supplementary material for: Sustainability Cost of Defect Engineering in Color Centers for Quantum Communications
Source: Research Square preprint supplement (doi:10.21203/rs.3.rs-7755251/v1), 2025-11-10
Supplement: Supplementary file 1 [file 241c5f3c9a3afd2f7b21fb92.docx]

***Supplementary Information***

**Sustainability Cost of Defect Engineering in Color Centers for Quantum Communications**

**Sahar Shataa and Julie M. Schoenunga,b,***

a Department of Materials Science & Engineering, Texas A&M University, College Station, TX, USA

b J. Mike Walker ’66 Department of Mechanical Engineering, Texas A&M University, College Station, TX, USA

* Corresponding author email: schoenung@tamu.edu

**The supplementary information contains the following sections and inventories:**

**NITROGEN VACANCY CENTERS IN DIAMOND**

**Table S1: Fabrication inventory calculations for nitrogen vacancy (NV) centers in diamond chip via ion implantation defect engineering technique.**

**Table S2: Fabrication inventory calculations for nitrogen vacancy (NV) centers in diamond chip via e-beam irradiation defect engineering technique.**

**Table S3: Fabrication inventory calculations for nitrogen vacancy (NV) centers in diamond chip via Laser writing defect engineering technique.**

**Table S4: Fabrication inventory calculations for nitrogen vacancy (NV) centers in diamond chip via heteroepitaxial growth and in-situ doping defect engineering technique.**

**DIVACANCY CENTERS IN SILICON CARBIDE**

**Table S5: Fabrication inventory calculations for divacancy (VV) centers in SiC chip via ion implantation defect engineering technique.**

**Table S6: Fabrication inventory calculations for divacancy (VV) centers in SiC chip via e-beam irradiation defect engineering technique.**

**Table S7: Fabrication inventory calculations for divacancy (VV) centers in SiC chip via laser writing defect engineering technique.**

**Table S8: Fabrication inventory calculations for divacancy (VV) centers in SiC chip via heteroepitaxial growth defect engineering technique.**

**BORON VACANCY CENTERS IN HEXAGONAL BORON NITRIDE**

**Table S9: Fabrication inventory calculations for boron vacancy (VB) centers in hexagonal boron nitride (h-BN) chip via ion implantation defect engineering technique.**

**Table S10: Fabrication inventory calculations for boron vacancy (VB) centers in hexagonal boron nitride (h-BN) chip via e-beam irradiation defect engineering technique.**

**Table S11: Fabrication inventory calculations for boron vacancy (VB) centers in hexagonal boron nitride (h-BN) chip via laser writing defect engineering technique.**

**Table S12: Fabrication inventory calculations for boron vacancy (VB) centers in hexagonal boron nitride (h-BN) chip via heteroepitaxial growth defect engineering technique.**

**ALUMINUM VACANCY CENTERS IN GALLIUM NITRIDE**

**Table S13: Fabrication inventory calculations for aluminum vacancy (VAl centers in GaN chip via ion implantation defect engineering technique.**

**Table S14: Fabrication inventory calculations for aluminum vacancy (VAl) centers in GaN chip via e-beam irradiation defect engineering technique.**

**Table S15: Fabrication inventory calculations for aluminum vacancy (VAl) color centers in GaN chip via laser writing defect engineering technique.**

**Table S16: Fabrication inventory calculations for aluminum vacancy (VAl) centers in GaN chip via heteroepitaxial growth defect engineering technique.**

**ZINC VACANCY CENTERS IN ZINC OXIDE**

**Table S17: Fabrication inventory calculations for zinc vacancy (VZn centers in ZnO chip via ion implantation defect engineering technique.**

**Table S18: Fabrication inventory calculations for zinc vacancy (VZn) centers in ZnO chip via e-beam irradiation defect engineering technique.**

**Table S19: Fabrication inventory calculations for zinc vacancy (VZn) centers in ZnO chip via laser writing defect engineering technique.**

**Table S20: Fabrication inventory calculations for zinc vacancy (VZn) centers in ZnO chip via heteroepitaxial growth defect engineering technique.**

**NITROGEN VACANCY CENTERS IN DIAMOND**

**Table S1: Fabrication inventory calculations for nitrogen vacancy (NV) centers in diamond chip via ion implantation defect engineering technique.1, 2, 3, 4, 5, 6**

| **Category** | **Inventory** | |
| --- | --- | --- |
| **Description/value** | **Calculation/estimation** |
| Substrate | Diamond | Chip dimensions 10 mm x 10 mm x 0.75 mm |
| Defect engineering | Ion Implantation | Ion source, ion implanter, and accelerator |
| Substrate growth | MPCVD* (150 μm/h), 900 oC, 100 Torr, CH4/H2 | Microwave generation = 4 kW x 5 h = 20 kWh  Plasma source = 1 kW x 5 h = 5 kWh  CVD chamber = 0.5 kW x 5 h = 2.5 kWh  Furnace = 2 kW x 5 h = 10 kWh  Vacuum pumping = 0.1 kW x 1 h = 0.1 kWh  CH4 = 2% (500 sccm x 5 h) = 3 L = 2.15 g  H2 = 98% (500 sccm x 5 h) = 147 L = 13.22 g |
| Ion implantation | N+ ions, 1013 ions/cm2 | N2+ = 1013 ions/cm2 x 1 cm2 = 1013 ions ≈ 0.5 ng  Implanter = 80 kW x 1 h = 80 kWh |
| Post-defect processing | Thermal annealing (1200 oC, Ar) | Furnace = 5 kW x 3 h = 15 kWh  Ar = 25 sccm x 3 h = L = 8 g |
| Reactive ion etching (Ar/Cl2 plasma) | Ar = 25 sccm x 10 min ≈ 0.5 g  Cl2 = 25 sccm x 10 min ≈ 0.8 g  RF source = 200 W x 10 min = 0.033 kWh |
| Chemical etching (HNO3/H2SO4 acids) | HNO3 = 100 mL = 141 g  H2SO4 = 100 mL = 184 g |
| Atomic layer deposition (Al2O3/HfO2 layers) | Al2O3 (5 nm) = 3.97 g/cm3 x 5 x 10-7 cm3 ≈ 1.985 μg  HfO2 (5 nm) = 9.68 g/cm3 x 5 x 10-7 cm3 ≈ 4.84 μg  Furnace = 2 kW x 5 min = 0.17 kWh |
| E-beam evaporation (Ti/Au gates) | Ti (5 nm) ≈ 0.0025 mg  Au (150 nm) ≈ 0.29 mg  Furnace = 5 kW x 3.3 h ≈ 16.5 kWh. |

***** MPCVD = Microwave Plasma Chemical Vapor Deposition

**Table S2: Fabrication inventory calculations for nitrogen vacancy (NV) centers in diamond chip via e-beam irradiation defect engineering technique.7, 8, 9, 10, 11**

| **Category** | **Inventory** | |
| --- | --- | --- |
| **Description/value** | **Calculation/estimation** |
| Substrate | Diamond | Chip dimensions 10 mm x 10 mm x 0.75 mm |
| Defect engineering | E-beam irradiation | Electron gun, accelerator, vacuum system |
| Substrate growth | MPCVD* (150 μm/h), 900 oC, 100 Torr, CH4/H2 | Microwave generation = 4 kW x 5 h = 20 kWh  Plasma source = 1 kW x 5 h = 5 kWh  CVD chamber = 0.5 kW x 5 h = 2.5 kWh  Furnace = 2 kW x 5 h = 10 kWh  Vacuum pumping = 0.1 kW x 1 h = 0.1 kWh  CH4 = 2% (500 sccm x 5 h) = 3 L = 2.15 g  H2 = 98% (500 sccm x 5 h) = 147 L = 13.22 g |
| E-beam irradiation | Electrons, 1013 e/cm2 | Accelerator = 20 kW x 1 h = 20 kWh |
| Post-defect processing | Thermal annealing (1200 oC, Ar) | Furnace = 5 kW x 3 h = 15 kWh  Ar = 25 sccm x 3 h = L = 8 g |
| Reactive ion etching (Ar/Cl2 plasma) | Ar = 25 sccm x 10 min ≈ 0.5 g  Cl2 = 25 sccm x 10 min ≈ 0.8 g  RF source = 200 W x 10 min = 0.033 kWh |
| Chemical etching (HNO3/H2SO4 acids) | HNO3 = 100 mL = 141 g  H2SO4 = 100 mL = 184 g |
| Atomic layer deposition (Al2O3/HfO2 layers) | Al2O3 (5 nm) = 3.97 g/cm3 x 5 x 10-7 cm3 ≈ 1.985 μg  HfO2 (5 nm) = 9.68 g/cm3 x 5 x 10-7 cm3 ≈ 4.84 μg  Furnace = 2 kW x 5 min = 0.17 kWh |
| E-beam evaporation (Ti/Au gates) | Ti (5 nm) ≈ 0.0025 mg  Au (150 nm) ≈ 0.29 mg  Furnace = 5 kW x 3.3 h ≈ 16.5 kWh. |

***** MPCVD = Microwave Plasma Chemical Vapor Deposition

**Table S3: Fabrication inventory calculations for nitrogen vacancy (NV) centers in diamond chip via Laser writing defect engineering technique.12, 13, 14, 15, 16**

| **Category** | **Inventory** | |
| --- | --- | --- |
| **Description/value** | **Calculation/estimation** |
| Substrate | Diamond | Chip dimensions 10 mm x 10 mm x 0.75 mm |
| Defect engineering | Laser writing | Laser source, chillers, chamber |
| Substrate growth | MPCVD* (150 μm/h), 900 oC, 100 Torr, CH4/H2 | Microwave generation = 4 kW x 5 h = 20 kWh  Plasma source = 1 kW x 5 h = 5 kWh  CVD chamber = 0.5 kW x 5 h = 2.5 kWh  Furnace = 2 kW x 5 h = 10 kWh  Vacuum pumping = 0.1 kW x 1 h = 0.1 kWh  CH4 = 2% (500 sccm x 5 h) = 3 L = 2.15 g  H2 = 98% (500 sccm x 5 h) = 147 L = 13.22 g |
| Laser writing | Femtosecond laser, 800 nm | Laser source = 4 kW x 1 h = 4 kWh  Chillers = 0.2 kW x 1 h = 0.2 kWh  Chillers (cooling water) = 6 L |
| Post-defect processing | Thermal annealing (1200 oC, Ar) | Furnace = 5 kW x 3 h = 15 kWh  Ar = 25 sccm x 3 h = L = 8 g |
| Reactive ion etching (Ar/Cl2 plasma) | Ar = 25 sccm x 10 min ≈ 0.5 g  Cl2 = 25 sccm x 10 min ≈ 0.8 g  RF source = 200 W x 10 min = 0.033 kWh |
| Chemical etching (HNO3/H2SO4 acids) | HNO3 = 100 mL = 141 g  H2SO4 = 100 mL = 184 g |

***** MPCVD = Microwave Plasma Chemical Vapor Deposition

**Table S4: Fabrication inventory calculations for nitrogen vacancy (NV) centers in diamond chip via heteroepitaxial growth and in-situ doping defect engineering technique.17, 18, 19, 20**

| **Category** | **Inventory** | |
| --- | --- | --- |
| **Description/value** | **Calculation/estimation** |
| Substrate | Diamond | Chip dimensions 10 mm x 10 mm x 0.70 mm  Thin film doped diamond 50 μm |
| Defect engineering | Heteroepitaxial growth and in-situ doping | MPCVD, in-situ doping of N |
| Substrate growth | MPCVD* (150 μm/h), 900 oC, 100 Torr, CH4/H2 | Microwave generation = 4 kW x 4.67 h = 18.68 kWh  Plasma source = 1 kW x 4.67 h = 4.67 kWh  CVD chamber = 0.5 kW x 4.67 h = 2.34 kWh  Furnace = 2 kW x 4.67 h = 9.34 kWh  Vacuum pumping = 0.1 kW x 1 h = 0.1 kWh  CH4 = 2% (500 sccm x 4.67 h) ≈ 2.01 g  H2 = 98% (500 sccm x 4.67 h) ≈ 12.34 g |
| Heteroepitaxial growth and in-situ doping | MPCVD (5 μm/h), 900 oC, 100 Torr, CH4/H2/N2 | Microwave generation = 4 kW x 10 h = 40 kWh  Plasma source = 1 kW x 10 h = 10 kWh  CVD chamber = 0.5 kW x 10 h = 5 kWh  Furnace = 2 kW x 10 h = 20 kWh  Vacuum pumping = 0.1 kW x 1 h = 0.1 kWh  CH4 = 2% (500 sccm x 10 h) ≈ 4.3 g  H2 = 98% (500 sccm x 4.67 h) ≈ 26.8 g  N2 = 5 sccm x 10 h ≈ 0.13 g |
| Post-defect processing | Reactive ion etching (Ar/Cl2 plasma) | Ar = 25 sccm x 10 min ≈ 0.5 g  Cl2 = 25 sccm x 10 min ≈ 0.8 g  RF source = 200 W x 10 min = 0.033 kWh |
| Chemical etching (HNO3/H2SO4 acids) | HNO3 = 100 mL = 141 g  H2SO4 = 100 mL = 184 g |
| Atomic layer deposition (Al2O3/HfO2 layers) | Al2O3 (5 nm) = 3.97 g/cm3 x 5 x 10-7 cm3 ≈ 1.985 μg  HfO2 (5 nm) = 9.68 g/cm3 x 5 x 10-7 cm3 ≈ 4.84 μg  Furnace = 2 kW x 5 min = 0.17 kWh |
| E-beam evaporation (Ti/Au gates) | Ti (5 nm) ≈ 0.0025 mg  Au (150 nm) ≈ 0.29 mg  Furnace = 5 kW x 3.3 h ≈ 16.5 kWh. |

***** MPCVD = Microwave Plasma Chemical Vapor Deposition

**DIVACANCY CENTERS IN SILICON CARBIDE**

**Table S5: Fabrication inventory calculations for divacancy (VV) centers in SiC chip via ion implantation defect engineering technique.21, 22, 23**

| **Category** | **Inventory** | |
| --- | --- | --- |
| **Description/value** | **Calculation/estimation** |
| Substrate | Silicon carbide (4H-SiC) | Chip dimensions 10 mm x 10 mm x 0.75 mm |
| Defect engineering | Ion Implantation | Ion source, ion implanter, and accelerator |
| Substrate growth | PVT* (37.5 μm/h), 2500 oC | Furnace = 10 kW x 20 h = 200 kWh  Vacuum pumping = 0.5 kW x 20 h = 10 kWh  Ar= 500 sccm x 20 h ≈ 1070.4 g  SiC (seed) = 0.24 g |
| Ion implantation | He+ ions, 1013 ions/cm2 | He+ = 1013 ions/cm2 x 1 cm2 = 1013 ions ≈ 0.07 ng  Implanter = 80 kW x 1 h = 80 kWh |
| Post-defect processing | Thermal annealing (1300 oC, Ar) | Furnace = 5 kW x 0.5 h = 2.5 kWh  Ar = 100 sccm x 0.5 h ≈ 4.8 g |
| Reactive ion etching (O2 plasma) | O2 = 25 sccm x 10 min ≈ 0.5 g  RF source = 200 W x 10 min = 0.033 kWh |
| Chemical etching (HF/H2O2 acid) | HF = 50 mL = 57.5 g  H2O2 = 50 mL = 15 g |
| Atomic layer deposition (Al2O3 layer) | Al2O3 (5 nm) = 3.97 g/cm3 x 5 x 10-7 cm3 ≈ 1.985 μg  Furnace = 2 kW x 5 min = 0.17 kWh |
| E-beam evaporation (Cr/Au gates) | Cr (5 nm) ≈ 0.003 mg  Au (150 nm) ≈ 0.29 mg  Furnace = 5 kW x 3.3 h ≈ 16.5 kWh. |

* PVT = Physical Vapor Transport

**Table S6: Fabrication inventory calculations for divacancy (VV) centers in SiC chip via e-beam irradiation defect engineering technique.24, 25, 26, 27**

| **Category** | **Inventory** | |
| --- | --- | --- |
| **Description/value** | **Calculation/estimation** |
| Substrate | Silicon carbide (4H-SiC) | Chip dimensions 10 mm x 10 mm x 0.75 mm |
| Defect engineering | E-beam irradiation | Electron gun, accelerator, vacuum system |
| Substrate growth | PVT* (37.5 μm/h), 2500 oC | Furnace = 10 kW x 20 h = 200 kWh  Vacuum pumping = 0.5 kW x 20 h = 10 kWh  Ar= 500 sccm x 20 h ≈ 1070.4 g  SiC (seed) = 0.24 g |
| E-beam irradiation | Electrons, 1013 e/cm2 | Accelerator = 20 kW x 1 h = 20 kWh |
| Post-defect processing | Thermal annealing (1300 oC, Ar) | Furnace = 5 kW x 0.5 h = 2.5 kWh  Ar = 100 sccm x 0.5 h ≈ 4.8 g |
| Reactive ion etching (O2 plasma) | O2 = 25 sccm x 10 min ≈ 0.5 g  RF source = 200 W x 10 min = 0.033 kWh |
| Chemical etching (HF/H2O2 acid) | HF = 50 mL = 57.5 g  H2O2 = 50 mL = 15 g |
| Atomic layer deposition (Al2O3 layer) | Al2O3 (5 nm) = 3.97 g/cm3 x 5 x 10-7 cm3 ≈ 1.985 μg  Furnace = 2 kW x 5 min = 0.17 kWh |
| E-beam evaporation (Cr/Au gates) | Cr (5 nm) ≈ 0.003 mg  Au (150 nm) ≈ 0.29 mg  Furnace = 5 kW x 3.3 h ≈ 16.5 kWh. |

* PVT = Physical Vapor Transport

**Table S7: Fabrication inventory calculations for divacancy (VV) centers in SiC chip via laser writing defect engineering technique.28, 29, 30, 31, 32**

| **Category** | **Inventory** | |
| --- | --- | --- |
| **Description/value** | **Calculation/estimation** |
| Substrate | Silicon carbide (4H-SiC) | Chip dimensions 10 mm x 10 mm x 0.75 mm |
| Defect engineering | Laser writing | Laser source, chillers, chamber |
| Substrate growth | PVT* (37.5 μm/h), 2500 oC | Furnace = 10 kW x 20 h = 200 kWh  Vacuum pumping = 0.5 kW x 20 h = 10 kWh  Ar= 500 sccm x 20 h ≈ 1070.4 g  SiC (seed) = 0.24 g |
| Laser writing | Femtosecond laser, 1030 nm | Laser source = 5 kW x 1 h = 5 kWh  Chillers = 0.2 kW x 1 h = 0.2 kWh  Chillers (cooling water) = 6 L |
| Post-defect processing | Thermal annealing (1300 oC, Ar) | Furnace = 5 kW x 0.5 h = 2.5 kWh  Ar = 100 sccm x 0.5 h ≈ 4.8 g |
| Reactive ion etching (O2 plasma) | O2 = 25 sccm x 10 min ≈ 0.5 g  RF source = 200 W x 10 min = 0.033 kWh |
| Chemical etching (HF/H2O2 acid) | HF = 50 mL = 57.5 g  H2O2 = 50 mL = 15 g |
| Atomic layer deposition (Al2O3 layer) | Al2O3 (5 nm) = 3.97 g/cm3 x 5 x 10-7 cm3 ≈ 1.985 μg  Furnace = 2 kW x 5 min = 0.17 kWh |
| E-beam evaporation (Cr/Au gates) | Cr (5 nm) ≈ 0.003 mg  Au (150 nm) ≈ 0.29 mg  Furnace = 5 kW x 3.3 h ≈ 16.5 kWh. |

* PVT = Physical Vapor Transport

**Table S8: Fabrication inventory calculations for divacancy (VV) centers in SiC chip via heteroepitaxial growth defect engineering technique.33, 34, 35**

| **Category** | **Inventory** | |
| --- | --- | --- |
| **Description/value** | **Calculation/estimation** |
| Substrate | Silicon carbide (4H-SiC) | Chip dimensions 10 mm x 10 mm x 0.70 mm  Thin film 50 μm with divacancies |
| Defect engineering | Heteroepitaxial growth | PVT, no in-situ doping |
| Substrate growth | PVT* (37.5 μm/h), 2500 oC | Furnace = 10 kW x 18.7 h = 187 kWh  Vacuum pumping = 0.5 kW x 18.7 h = 9.35 kWh  Ar= 500 sccm x 18.7 h ≈ 1001.4 g  SiC (seed) = 0.21 g |
| Heteroepitaxial growth | PVT (5 μm/h), 2500 oC | Furnace = 10 kW x 10 h = 100 kWh  Vacuum pumping = 0.5 kW x 10 h = 5 kWh  Ar= 500 sccm x 10 h ≈ 267.6 g  SiC (seed) = 0.015 g |
| Post-defect processing | Reactive ion etching (O2 plasma) | O2 = 25 sccm x 10 min ≈ 0.5 g  RF source = 200 W x 10 min = 0.033 kWh |
| Chemical etching (HF/H2O2 acid) | HF = 50 mL = 57.5 g  H2O2 = 50 mL = 15 g |
| Atomic layer deposition (Al2O3 layer) | Al2O3 (5 nm) = 3.97 g/cm3 x 5 x 10-7 cm3 ≈ 1.985 μg  Furnace = 2 kW x 5 min = 0.17 kWh |
| E-beam evaporation (Cr/Au gates) | Cr (5 nm) ≈ 0.003 mg  Au (150 nm) ≈ 0.29 mg  Furnace = 5 kW x 3.3 h ≈ 16.5 kWh. |

* PVT = Physical Vapor Transport

**BORON VACANCY CENTERS IN HEXAGONAL BORON NITRIDE**

**Table S9: Fabrication inventory calculations for boron vacancy (VB) centers in hexagonal boron nitride (h-BN) chip via ion implantation defect engineering technique.36, 37, 38, 39**

| **Category** | **Inventory** | |
| --- | --- | --- |
| **Description/value** | **Calculation/estimation** |
| Substrate | Hexagonal boron nitride (h-BN) | Chip dimensions 10 mm x 10 mm x 0.75 mm |
| Defect engineering | Ion Implantation | Ion source, ion implanter, and accelerator |
| Substrate growth | LPCVD* (150 μm/h), 1000 oC | Furnace = 2.5 kW x 5 h = 12.5 kWh  Vacuum pumping = 0.1 kW x 5 h = 0.5 kWh  H2 = 500 sccm x 5 h ≈ 13.47 g  Ammonia borane (NH3BH3) = 500 sccm x 5 h = 0.81 g |
| Ion implantation | He+ ions, 1013 ions/cm2 | He+ = 1013 ions/cm2 x 1 cm2 = 1013 ions ≈ 0.07 ng  Implanter = 80 kW x 0.3 h = 24 kWh |
| Post-defect processing | Thermal annealing (1100 oC, N2) | Furnace = 5 kW x 1 h = 5 kWh  N2 = 100 sccm x 1 h ≈ 7.5 g |
| Reactive ion etching (O2 plasma) | O2 = 25 sccm x 10 min ≈ 0.36 g  RF source = 200 W x 10 min = 0.033 kWh |
| Chemical etching (HF acid) | HF = 100 mL = 115 g |
| Atomic layer deposition (Al2O3 layer) | Al2O3 (5 nm) = 3.97 g/cm3 x 5 x 10-7 cm3 ≈ 1.985 μg  Furnace = 2 kW x 5 min = 0.17 kWh |
| Electrostatic gating (graphene gates) | Graphene ≈ 0.77 μg  Acetone = 50 mL = 39.2 g  Isopropanol = 50 mL = 39.3 g |

* LPCVD = Low-Pressure Chemical Vapor Deposition

**Table S10: Fabrication inventory calculations for boron vacancy (VB) centers in hexagonal boron nitride (h-BN) chip via e-beam irradiation defect engineering technique.38, 40, 41**

| **Category** | **Inventory** | |
| --- | --- | --- |
| **Description/value** | **Calculation/estimation** |
| Substrate | Hexagonal boron nitride (h-BN) | Chip dimensions 10 mm x 10 mm x 0.75 mm |
| Defect engineering | E-beam irradiation | Electron gun, accelerator, vacuum system |
| Substrate growth | LPCVD* (150 μm/h), 1000 oC | Furnace = 2.5 kW x 5 h = 12.5 kWh  Vacuum pumping = 0.1 kW x 5 h = 0.5 kWh  H2 = 500 sccm x 5 h ≈ 13.47 g  Ammonia borane (NH3BH3) = 500 sccm x 5 h = 0.81 g |
| E-beam irradiation | Electrons, 1013 e/cm2 | Accelerator = 20 kW x 0.5 h = 10 kWh |
| Post-defect processing | Thermal annealing (1100 oC, N2) | Furnace = 5 kW x 1 h = 5 kWh  N2 = 100 sccm x 1 h ≈ 7.5 g |
| Reactive ion etching (O2 plasma) | O2 = 25 sccm x 10 min ≈ 0.36 g  RF source = 200 W x 10 min = 0.033 kWh |
| Chemical etching (HF acid) | HF = 100 mL = 115 g |
| Atomic layer deposition (Al2O3 layer) | Al2O3 (5 nm) = 3.97 g/cm3 x 5 x 10-7 cm3 ≈ 1.985 μg  Furnace = 2 kW x 5 min = 0.17 kWh |
| Electrostatic gating (graphene gates) | Graphene ≈ 0.77 μg  Acetone = 50 mL = 39.2 g  Isopropanol = 50 mL = 39.3 g |

* LPCVD = Low-Pressure Chemical Vapor Deposition

**Table S11: Fabrication inventory calculations for boron vacancy (VB) centers in hexagonal boron nitride (h-BN) chip via laser writing defect engineering technique.42, 43, 44, 45, 46**

| **Category** | **Inventory** | |
| --- | --- | --- |
| **Description/value** | **Calculation/estimation** |
| Substrate | Hexagonal boron nitride (h-BN) | Chip dimensions 10 mm x 10 mm x 0.75 mm |
| Defect engineering | Laser writing | Laser source, chillers, chamber |
| Substrate growth | LPCVD* (150 μm/h), 1000 oC | Furnace = 2.5 kW x 5 h = 12.5 kWh  Vacuum pumping = 0.1 kW x 5 h = 0.5 kWh  H2 = 500 sccm x 5 h ≈ 13.47 g  Ammonia borane (NH3BH3) = 500 sccm x 5 h = 0.81 g |
| Laser writing | Femtosecond laser, 515 nm | Laser source = 4 kW x 1 h = 4 kWh  Chillers = 0.2 kW x 1 h = 0.2 kWh  Chillers (cooling water) = 6 L |

* LPCVD = Low-Pressure Chemical Vapor Deposition

**Table S12: Fabrication inventory calculations for boron vacancy (VB) centers in hexagonal boron nitride (h-BN) chip via heteroepitaxial growth defect engineering technique.47, 48**

| **Category** | **Inventory** | |
| --- | --- | --- |
| **Description/value** | **Calculation/estimation** |
| Substrate | Hexagonal boron nitride (h-BN) | Chip dimensions 10 mm x 10 mm x 0.745 mm  Thin film 5 μm, VB centers |
| Defect engineering | Heteroepitaxial growth | LPCVD, no in-situ doping |
| Substrate growth | LPCVD* (150 μm/h), 1000 oC | Furnace = 2.5 kW x 4.97 h = 12.42 kWh  Vacuum pumping = 0.1 kW x 4.97 h = 0.5 kWh  H2 = 500 sccm x 4.97 h ≈ 13.4 g  Ammonia borane (NH3BH3) = 500 sccm x 4.97 h = 0.81 g |
| Heteroepitaxial growth | LPCVD (5 μm/h), 1000 oC | Furnace = 2.5 kW x 1 h = 2.5 kWh  Vacuum pumping = 0.1 kW x 1 h = 0.1 kWh  H2 = 500 sccm x 1 h ≈ 2.7 g  Ammonia borane (NH3BH3) = 500 sccm x 1 h = 0.38 g |
| Post-defect processing | Thermal annealing (1100 oC, N2) | Furnace = 5 kW x 1 h = 5 kWh  N2 = 100 sccm x 1 h ≈ 7.5 g |
| Reactive ion etching (O2 plasma) | O2 = 25 sccm x 10 min ≈ 0.36 g  RF source = 200 W x 10 min = 0.033 kWh |
| Chemical etching (HF acid) | HF = 100 mL = 115 g |
| Atomic layer deposition (Al2O3 layer) | Al2O3 (5 nm) = 3.97 g/cm3 x 5 x 10-7 cm3 ≈ 1.985 μg  Furnace = 2 kW x 5 min = 0.17 kWh |
| Electrostatic gating (graphene gates) | Graphene ≈ 0.77 μg  Acetone = 50 mL = 39.2 g  Isopropanol = 50 mL = 39.3 g |

* LPCVD = Low-Pressure Chemical Vapor Deposition

**ALUMINUM VACANCY CENTERS IN GALLIUM NITRIDE**

**Table S13: Fabrication inventory calculations for aluminum vacancy (VAl centers in GaN chip via ion implantation defect engineering technique.49, 50**

| **Category** | **Inventory** | |
| --- | --- | --- |
| **Description/value** | **Calculation/estimation** |
| Substrate | Gallium nitride (GaN) | Chip dimensions 10 mm x 10 mm x 0.75 mm |
| Defect engineering | Ion Implantation | Ion source, ion implanter, and accelerator |
| Substrate growth | MOCVD* (150 μm/h), 1050 oC | Furnace = 2.5 kW x 5 h = 12.5 kWh  Vacuum pumping = 0.1 kW x 5 h = 0.5 kWh  H2 = 500 sccm x 5 h ≈ 13.47 g  Trimethylgallium (Ga (CH3)3) = 10 sccm x 5 h = 5.43 g  Ammonia (NH3) = 5000 sccm x 5 h = 915 g |
| Ion implantation | N+ ions, 1013 ions/cm2 | He+ = 1013 ions/cm2 x 1 cm2 = 1013 ions ≈ 0.07 ng  Implanter = 80 kW x 0.3 h = 24 kWh |
| Post-defect processing | Thermal annealing (1200 oC, N2) | Furnace = 5 kW x 3 h = 15 kWh  N2 = 25 sccm x 3 h ≈ 5.6 g |
| Reactive ion etching (Cl2 plasma) | Cl2 = 25 sccm x 10 min ≈ 0.8 g  RF source = 200 W x 10 min = 0.033 kWh |
| Chemical etching (HF acid) | HF = 100 mL = 115 g |
| Atomic layer deposition (HfO2 /SiNx layers) | HfO2 (5 nm) = 9.68 g/cm3 x 5 x 10-7 cm3 ≈ 4.84 μg  SiNx (5 nm) = 3.1 g/cm3 x 5 x 10-7 cm3 ≈ 1.55 μg  Furnace = 2 kW x 5 min = 0.17 kWh |

* MOCVD = Metal Organic Chemical Vapor Deposition

**Table S14: Fabrication inventory calculations for aluminum vacancy (VAl) centers in GaN chip via e-beam irradiation defect engineering technique.51, 52**

| **Category** | **Inventory** | |
| --- | --- | --- |
| **Description/value** | **Calculation/estimation** |
| Substrate | Gallium nitride (GaN) | Chip dimensions 10 mm x 10 mm x 0.75 mm |
| Defect engineering | E-beam irradiation | Electron gun, accelerator, vacuum system |
| Substrate growth | MOCVD* (150 μm/h), 1050 oC | Furnace = 2.5 kW x 5 h = 12.5 kWh  Vacuum pumping = 0.1 kW x 5 h = 0.5 kWh  H2 = 500 sccm x 5 h ≈ 13.47 g  Trimethylgallium (Ga (CH3)3) = 10 sccm x 5 h = 5.43 g  Ammonia (NH3) = 5000 sccm x 5 h = 915 g |
| E-beam irradiation | Electrons, 1013 e/cm2 | Accelerator = 20 kW x 0.5 h = 10 kWh |
| Post-defect processing | Thermal annealing (1200 oC, N2) | Furnace = 5 kW x 3 h = 15 kWh  N2 = 25 sccm x 3 h ≈ 5.6 g |
| Reactive ion etching (Cl2 plasma) | Cl2 = 25 sccm x 10 min ≈ 0.8 g  RF source = 200 W x 10 min = 0.033 kWh |
| Chemical etching (HF acid) | HF = 100 mL = 115 g |
| Atomic layer deposition (HfO2 /SiNx layers) | HfO2 (5 nm) = 9.68 g/cm3 x 5 x 10-7 cm3 ≈ 4.84 μg  SiNx (5 nm) = 3.1 g/cm3 x 5 x 10-7 cm3 ≈ 1.55 μg  Furnace = 2 kW x 5 min = 0.17 kWh |

* MOCVD = Metal Organic Chemical Vapor Deposition

**Table S15: Fabrication inventory calculations for aluminum vacancy (VAl) color centers in GaN chip via laser writing defect engineering technique.32, 53, 54**

| **Category** | **Inventory** | |
| --- | --- | --- |
| **Description/value** | **Calculation/estimation** |
| Substrate | Gallium nitride (GaN) | Chip dimensions 10 mm x 10 mm x 0.75 mm |
| Defect engineering | Laser writing | Laser source, chillers, chamber |
| Substrate growth | MOCVD* (150 μm/h), 1050 oC | Furnace = 2.5 kW x 5 h = 12.5 kWh  Vacuum pumping = 0.1 kW x 5 h = 0.5 kWh  H2 = 500 sccm x 5 h ≈ 13.47 g  Trimethylgallium (Ga (CH3)3) = 10 sccm x 5 h = 5.43 g  Ammonia (NH3) = 5000 sccm x 5 h = 915 g |
| Laser writing | Femtosecond laser, 515 nm | Laser source = 4 kW x 1 h = 4 kWh  Chillers = 0.2 kW x 1 h = 0.2 kWh  Chillers (cooling water) = 6 L |

* MOCVD = Metal Organic Chemical Vapor Deposition

**Table S16: Fabrication inventory calculations for aluminum vacancy (VAl) centers in GaN chip via heteroepitaxial growth defect engineering technique.52, 55, 56**

| **Category** | **Inventory** | |
| --- | --- | --- |
| **Description/value** | **Calculation/estimation** |
| Substrate | Gallium nitride (GaN) | Chip dimensions 10 mm x 10 mm x 0.7 mm  Thin film 50 μm, VAl centers |
| Defect engineering | Heteroepitaxial growth | MOCVD, no in-situ doping |
| Substrate growth | MOCVD* (150 μm/h), 1050 oC | Furnace = 2.5 kW x 4.67 h = 11.68 kWh  Vacuum pumping = 0.1 kW x 4.67 h = 0.47 kWh  H2 = 500 sccm x 4.67 h ≈ 12.57 g  Trimethylgallium (Ga (CH3)3) = 10 sccm x 4.67 h = 5.07 g  Ammonia (NH3) = 5000 sccm x 4.67 h = 854 g |
| Heteroepitaxial growth | MOCVD (5 μm/h), 1050 oC | Furnace = 2.5 kW x 10 h = 25 kWh  Vacuum pumping = 0.1 kW x 10 h = 1 kWh  H2 = 500 sccm x 10 h ≈ 27 g  Trimethylgallium (Ga (CH3)3) = 10 sccm x 10 h = 11.4 g  Ammonia (NH3) = 5000 sccm x 10 h = 1830 g |
| Post-defect processing | Thermal annealing (1200 oC, N2) | Furnace = 5 kW x 3 h = 15 kWh  N2 = 25 sccm x 3 h ≈ 5.6 g |
| Reactive ion etching (Cl2 plasma) | Cl2 = 25 sccm x 10 min ≈ 0.8 g  RF source = 200 W x 10 min = 0.033 kWh |
| Chemical etching (HF acid) | HF = 100 mL = 115 g |
| Atomic layer deposition (HfO2 /SiNx layers) | HfO2 (5 nm) = 9.68 g/cm3 x 5 x 10-7 cm3 ≈ 4.84 μg  SiNx (5 nm) = 3.1 g/cm3 x 5 x 10-7 cm3 ≈ 1.55 μg  Furnace = 2 kW x 5 min = 0.17 kWh |

* MOCVD = Metal Organic Chemical Vapor Deposition

**ZINC VACANCY CENTERS IN ZINC OXIDE**

**Table S17: Fabrication inventory calculations for zinc vacancy (VZn centers in ZnO chip via ion implantation defect engineering technique.57, 58**

| **Category** | **Inventory** | |
| --- | --- | --- |
| **Description/value** | **Calculation/estimation** |
| Substrate | Zinc oxide (ZnO) | Chip dimensions 10 mm x 10 mm x 0.75 mm |
| Defect engineering | Ion Implantation | Ion source, ion implanter, and accelerator |
| Substrate growth | MOCVD (150 μm/h), 600 oC | Furnace = 2.5 kW x 5 h = 12.5 kWh  Vacuum pumping = 0.1 kW x 5 h = 0.5 kWh  Ar= 500 sccm x 5 h ≈ 267 g  diethylzinc (C4H10Zn) = 10 sccm x 5 h = 7.2 g  O2 = 500 sccm x 5 h = 214 g |
| Ion implantation | He+ ions, 1013 ions/cm2 | He+ = 1013 ions/cm2 x 1 cm2 = 1013 ions ≈ 0.07 ng  Implanter = 80 kW x 0.3 h = 24 kWh |
| Post-defect processing | Thermal annealing (800 oC, N2) | Furnace = 5 kW x 3 h = 15 kWh  N2 = 25 sccm x 3 h ≈ 5.6 g |
| Chemical etching (HF/HCl acid) | HF = 50 mL = 57.5 g  HCl = 50 mL = 59.5 g |
| Atomic layer deposition (Al2O3 / ZnO layers) | Al2O3 (5 nm) = 3.97 g/cm3 x 5 x 10-7 cm3 ≈ 1.985 μg  ZnO (5 nm) = 5.61 g/cm3 x 5 x 10-7 cm3 ≈ 2.8 μg  Furnace = 2 kW x 5 min = 0.17 kWh |

**Table S18: Fabrication inventory calculations for zinc vacancy (VZn) centers in ZnO chip via e-beam irradiation defect engineering technique.59, 60, 61**

| **Category** | **Inventory** | |
| --- | --- | --- |
| **Description/value** | **Calculation/estimation** |
| Substrate | Zinc oxide (ZnO) | Chip dimensions 10 mm x 10 mm x 0.75 mm |
| Defect engineering | E-beam irradiation | Electron gun, accelerator, vacuum system |
| Substrate growth | MOCVD (150 μm/h), 600 oC | Furnace = 2.5 kW x 5 h = 12.5 kWh  Vacuum pumping = 0.1 kW x 5 h = 0.5 kWh  Ar= 500 sccm x 5 h ≈ 267 g  diethylzinc (C4H10Zn) = 10 sccm x 5 h = 7.2 g  O2 = 500 sccm x 5 h = 214 g |
| E-beam irradiation | Electrons, 1013 e/cm2 | Accelerator = 20 kW x 0.5 h = 10 kWh |
| Post-defect processing | Thermal annealing (800 oC, N2) | Furnace = 5 kW x 3 h = 15 kWh  N2 = 25 sccm x 3 h ≈ 5.6 g |
| Chemical etching (HF/HCl acid) | HF = 50 mL = 57.5 g  HCl = 50 mL = 59.5 g |
| Atomic layer deposition (Al2O3 / ZnO layers) | Al2O3 (5 nm) = 3.97 g/cm3 x 5 x 10-7 cm3 ≈ 1.985 μg  ZnO (5 nm) = 5.61 g/cm3 x 5 x 10-7 cm3 ≈ 2.8 μg  Furnace = 2 kW x 5 min = 0.17 kWh |

**Table S19: Fabrication inventory calculations for zinc vacancy (VZn) centers in ZnO chip via laser writing defect engineering technique.62, 63, 64, 65**

| **Category** | **Inventory** | |
| --- | --- | --- |
| **Description/value** | **Calculation/estimation** |
| Substrate | Zinc oxide (ZnO) | Chip dimensions 10 mm x 10 mm x 0.75 mm |
| Defect engineering | Laser writing | Laser source, chillers, chamber |
| Substrate growth | MOCVD (150 μm/h), 600 oC | Furnace = 2.5 kW x 5 h = 12.5 kWh  Vacuum pumping = 0.1 kW x 5 h = 0.5 kWh  Ar= 500 sccm x 5 h ≈ 267 g  diethylzinc (C4H10Zn) = 10 sccm x 5 h = 7.2 g  O2 = 500 sccm x 5 h = 214 g |
| Laser writing | Femtosecond laser, 800 nm | Laser source = 5 kW x 1 h = 5 kWh  Chillers = 0.2 kW x 1 h = 0.2 kWh  Chillers (cooling water) = 6 L |

**Table S20: Fabrication inventory calculations for zinc vacancy (VZn) centers in ZnO chip via heteroepitaxial growth defect engineering technique.66, 67, 68**

| **Category** | **Inventory** | |
| --- | --- | --- |
| **Description/value** | **Calculation/estimation** |
| Substrate | Zinc oxide (ZnO) | Chip dimensions 10 mm x 10 mm x 0.7 mm  Thin film 50 μm, VZn centers |
| Defect engineering | Heteroepitaxial growth | MOCVD, no in-situ doping |
| Substrate growth | MOCVD (150 μm/h), 600 oC | Furnace = 2.5 kW x 4.67 h = 11.68 kWh  Vacuum pumping = 0.1 kW x 4.67 h = 0.47 kWh  Ar= 500 sccm x 4.67 h ≈ 249 g  diethylzinc (C4H10Zn) = 10 sccm x 4.67 h = 6.7 g  O2 = 500 sccm x 4.67 h = 200 g |
| Heteroepitaxial growth | MOCVD (5 μm/h), 600 oC | Furnace = 2.5 kW x 10 h = 25 kWh  Vacuum pumping = 0.1 kW x 10 h = 1 kWh  Ar= 500 sccm x 10 h ≈ 534 g  diethylzinc (C4H10Zn) = 10 sccm x 10 h = 14.4 g  O2 = 500 sccm x 10 h = 429 g |
| Post-defect processing | Thermal annealing (800 oC, N2) | Furnace = 5 kW x 3 h = 15 kWh  N2 = 25 sccm x 3 h ≈ 5.6 g |
| Chemical etching (HF/HCl acid) | HF = 50 mL = 57.5 g  HCl = 50 mL = 59.5 g |
| Atomic layer deposition (Al2O3 / ZnO layers) | Al2O3 (5 nm) = 3.97 g/cm3 x 5 x 10-7 cm3 ≈ 1.985 μg  ZnO (5 nm) = 5.61 g/cm3 x 5 x 10-7 cm3 ≈ 2.8 μg  Furnace = 2 kW x 5 min = 0.17 kWh |

**References**

1. Haque A, Sumaiya S. An Overview on the Formation and Processing of Nitrogen-Vacancy Photonic Centers in Diamond by Ion Implantation. *Journal of Manufacturing and Materials Processing* **1**, 6 (2017).

2. Toyli DM, Weis CD, Fuchs GD, Schenkel T, Awschalom DD. Chip-scale nanofabrication of single spins and spin arrays in diamond. *Nano letters* **10**, 3168-3172 (2010).

3. Sangtawesin S, Brundage T, Atkins Z, Petta JR. Highly tunable formation of nitrogen-vacancy centers via ion implantation. *Applied Physics Letters* **105**, (2014).

4. Naydenov B*, et al.* Increasing the coherence time of single electron spins in diamond by high temperature annealing. *Applied Physics Letters* **97**, (2010).

5. Santori C, Barclay PE, Fu K-MC, Beausoleil RG. Vertical distribution of nitrogen-vacancy centers in diamond formed by ion implantation and annealing. *Physical Review B—Condensed Matter and Materials Physics* **79**, 125313 (2009).

6. Lang N*, et al.* Controlled lateral positioning of NV centres in diamond by CVD overgrowth. *Physica Scripta* **99**, 105408 (2024).

7. Ishii S, Saiki S, Onoda S, Masuyama Y, Abe H, Ohshima T. Ensemble negatively-charged nitrogen-vacancy centers in type-Ib diamond created by high fluence electron beam irradiation. *Quantum Beam Science* **6**, 2 (2021).

8. Losero E*, et al.* Creation of NV centers in diamond under 155 MeV electron irradiation. *Advanced Physics Research* **3**, 2300071 (2024).

9. Schwartz J, Aloni S, Ogletree DF, Schenkel T. Effects of low-energy electron irradiation on formation of nitrogen–vacancy centers in single-crystal diamond. *New Journal of Physics* **14**, 043024 (2012).

10. McLellan CA, Myers BA, Kraemer S, Ohno K, Awschalom DD, Bleszynski Jayich AC. Patterned formation of highly coherent nitrogen-vacancy centers using a focused electron irradiation technique. *Nano letters* **16**, 2450-2454 (2016).

11. Solà-Garcia M, Meuret S, Coenen T, Polman A. Electron-induced state conversion in diamond NV centers measured with pump–probe cathodoluminescence spectroscopy. *ACS photonics* **7**, 232-240 (2019).

12. Chen Y-C*, et al.* Laser writing of coherent colour centres in diamond. *Nature Photonics* **11**, 77-80 (2017).

13. Gao S*, et al.* Laser-induced color centers in crystals. *Optics & Laser Technology* **146**, 107527 (2022).

14. Addhya A*, et al.* Photonic-Cavity-Enhanced Laser Writing of Color Centers in Diamond. *Nano Letters* **24**, 11224-11231 (2024).

15. Szunerits S, Boukherroub R. Different strategies for functionalization of diamond surfaces. *Journal of Solid State Electrochemistry* **12**, 1205-1218 (2008).

16. Smith JM, Meynell SA, Bleszynski Jayich AC, Meijer J. Colour centre generation in diamond for quantum technologies. *Nanophotonics* **8**, 1889-1906 (2019).

17. Eichhorn TR, McLellan CA, Bleszynski Jayich AC. Optimizing the formation of depth-confined nitrogen vacancy center spin ensembles in diamond for quantum sensing. *Physical Review Materials* **3**, 113802 (2019).

18. Bogdanov S*, et al.* Optical investigation of as-grown NV centers in heavily nitrogen doped delta layers in CVD diamond. *Materials Today Communications* **24**, 101019 (2020).

19. Weippert J*, et al.* NV-doped microstructures with preferential orientation by growth on heteroepitaxial diamond. *Journal of Applied Physics* **133**, (2023).

20. Schreck M, Gsell S, Brescia R, Fischer M. Ion bombardment induced buried lateral growth: the key mechanism for the synthesis of single crystal diamond wafers. *Scientific reports* **7**, 44462 (2017).

21. Lin W-X*, et al.* Room temperature coherent control of a single solid-state spin under anti-Stokes excitation. *Physical Review B* **108**, 235312 (2023).

22. Lin W-X*, et al.* Temperature dependence of divacancy spin coherence in implanted silicon carbide. *Physical Review B* **104**, 125305 (2021).

23. Sun T*, et al.* Divacancy and silicon vacancy color centers in 4H-SiC fabricated by hydrogen and dual ions implantation and annealing. *Ceramics International* **49**, 7452-7465 (2023).

24. Son N, Shafizadeh D, Ohshima T, Ivanov I. Modified divacancies in 4H-SiC. *Journal of Applied Physics* **132**, (2022).

25. Kimura T*, et al.* Computationally guided experimental validation of divacancy defect formation in 4H-SiC. *Applied Physics Letters* **126**, (2025).

26. Xiong H*, et al.* Defects evolution in n-type 4H-SiC induced by electron irradiation and annealing. *Journal of Semiconductors* **45**, 072502 (2024).

27. Son N*, et al.* Electron-paramagnetic-resonance studies of defects in electron-irradiated p-type 4H and 6H SiC. *Physica B: Condensed Matter* **273**, 655-658 (1999).

28. Almutairi AFM, Partridge J, Xu C, Cole I, Holland A. Direct writing of divacancy centers in silicon carbide by femtosecond laser irradiation and subsequent thermal annealing. *Applied Physics Letters* **120**, (2022).

29. Castelletto S*, et al.* Photoluminescence in hexagonal silicon carbide by direct femtosecond laser writing. *Optics letters* **43**, 6077-6080 (2018).

30. Chen Y-C*, et al.* Laser writing of scalable single color centers in silicon carbide. *Nano letters* **19**, 2377-2383 (2019).

31. Wang J*, et al.* Femtosecond laser controllable annealing for color centers based on ion-implanted silicon carbide substrate. *Ceramics International* **50**, 46566-46578 (2024).

32. Castelletto S, Maksimovic J, Katkus T, Ohshima T, Johnson BC, Juodkazis S. Color centers enabled by direct femto-second laser writing in wide bandgap semiconductors. *Nanomaterials* **11**, 72 (2020).

33. Zhang S, Fan G, Li T, Zhao L. Optimization of thermal field of 150 mm SiC crystal growth by PVT method. *RSC advances* **12**, 19936-19945 (2022).

34. Magnusson B*, et al.* Excitation properties of the divacancy in 4 H-SiC. *Physical Review B* **98**, 195202 (2018).

35. Ji Y*, et al.* Optimization of temperature field and crystal growth in the PVT method for high-quality 8-inch silicon carbide single crystal growth. *Journal of Crystal Growth* **664**, 128181 (2025).

36. Guo N-J*, et al.* Generation of spin defects by ion implantation in hexagonal boron nitride. *ACS omega* **7**, 1733-1739 (2022).

37. Zabelotsky T*, et al.* Creation of boron vacancies in hexagonal boron nitride exfoliated from bulk crystals for quantum sensing. *ACS Applied Nano Materials* **6**, 21671-21678 (2023).

38. Murzakhanov FF*, et al.* Creation of negatively charged boron vacancies in hexagonal boron nitride crystal by electron irradiation and mechanism of inhomogeneous broadening of boron vacancy-related spin resonance lines. *Nanomaterials* **11**, 1373 (2021).

39. Qian P*, et al.* Investigation of spin defects in hexagonal boron nitride generated via ion implantation. *Optics Express* **32**, 46489-46499 (2024).

40. Healey AJ*, et al.* Optimisation of electron irradiation for creating spin ensembles in hexagonal boron nitride. *Materials for Quantum Technology* **4**, 035701 (2024).

41. Bianco F, Corte E, Ditalia Tchernij S, Forneris J, Fabbri F. Engineering multicolor radiative centers in hBN flakes by varying the electron beam irradiation parameters. *Nanomaterials* **13**, 739 (2023).

42. Gan L*, et al.* Large-scale, high-yield laser fabrication of bright and pure single-photon emitters at room temperature in hexagonal boron nitride. *ACS nano* **16**, 14254-14261 (2022).

43. Vaidya S, Gao X, Dikshit S, Aharonovich I, Li T. Quantum sensing and imaging with spin defects in hexagonal boron nitride. *Advances in Physics: X* **8**, 2206049 (2023).

44. Hou S*, et al.* Localized emission from laser-irradiated defects in 2D hexagonal boron nitride. *2D Materials* **5**, 015010 (2017).

45. Yang Y-Z*, et al.* Laser direct writing of visible spin defects in hexagonal boron nitride for applications in spin-based technologies. *ACS Applied Nano Materials* **6**, 6407-6414 (2023).

46. Gao X*, et al.* Femtosecond laser writing of spin defects in hexagonal boron nitride. *ACS Photonics* **8**, 994-1000 (2021).

47. Li Z*, et al.* Research progress on the epitaxial growth of hexagonal boron nitride on different substrates by the CVD method. *Nanoscale Advances* **7**, 2395-2417 (2025).

48. Singhal R, Echeverria E, McIlroy DN, Singh RN. Post-growth enhancement of CVD-grown hexagonal boron nitride films on sapphire. *Results in Materials* **16**, 100339 (2022).

49. Uedono A*, et al.* Annealing properties of vacancy-type defects in ion-implanted GaN studied by monoenergetic positron beams. *Journal of Applied Physics* **102**, (2007).

50. Shi Y-T*, et al.* Realization of p-type gallium nitride by magnesium ion implantation for vertical power devices. *Scientific Reports* **9**, 8796 (2019).

51. Saarinen K, Suski T, Grzegory I, Look DC. Ga vacancies in electron irradiated GaN: introduction, stability and temperature dependence of positron trapping. *Physica B: Condensed Matter* **308-310**, 77-80 (2001).

52. Watkins GD*, et al.* Intrinsic defects in GaN: what we are learning from magnetic resonance studies. *Physica B: Condensed Matter* **340-342**, 25-31 (2003).

53. Pearton SJ, Zolper JC, Shul RJ, Ren F. GaN: Processing, defects, and devices. *Journal of Applied Physics* **86**, 1-78 (1999).

54. Hua R, Xu Z, Tao Z, Dong B, Wang H, Yang L. Fabrication of high-quality surface microtextures on GaN by femtosecond laser direct writing. *Nanotechnology and Precision Engineering* **8**, (2024).

55. Mansor M*, et al.* Enhancement of gallium nitride on silicon (111) using pulse atomic-layer epitaxy (PALE) AlN with composition-graded AlGaN buffer. *Scientific Reports* **13**, 8793 (2023).

56. Rabiee Golgir H*, et al.* Fast growth of GaN epilayers via laser-assisted metal–organic chemical vapor deposition for ultraviolet photodetector applications. *ACS applied materials & interfaces* **9**, 21539-21547 (2017).

57. Selim FA, Weber MH, Solodovnikov D, Lynn KG. Nature of Native Defects in ZnO. *Physical Review Letters* **99**, 085502 (2007).

58. Pan M*, et al.* Metal-organic chemical vapor deposition of ZnO. *Journal of crystal growth* **287**, 688-693 (2006).

59. Evans SM, Giles NC, Halliburton LE, Kappers LA. Further characterization of oxygen vacancies and zinc vacancies in electron-irradiated ZnO. *Journal of Applied Physics* **103**, (2008).

60. Knutsen KE*, et al.* Zinc vacancy and oxygen interstitial in ZnO revealed by sequential annealing and electron irradiation. *Physical Review B* **86**, 121203 (2012).

61. Tuomisto F, Saarinen K, Look DC, Farlow GC. Introduction and recovery of point defects in electron-irradiated ZnO. *Physical Review B* **72**, 085206 (2005).

62. Shen Y*, et al.* Femtosecond laser writing of waveguides in zinc oxide crystals: fabrication and mode modulation. *Optics Express* **30**, 27694-27703 (2022).

63. Museur L, Manousaki A, Anglos D, Kanaev AV. Surface modification of monocrystalline zinc oxide induced by high-density electronic excitation. *Journal of Applied Physics* **110**, (2011).

64. Nie M, Zhao Y, Zeng Y. Effects of annealing and laser irradiation on optical and electrical properties of ZnO thin films. *Journal of Laser Applications* **26**, (2014).

65. Khudiar AI, Mohsen MK, Oufi AM. Laser-induced oxygen vacancies for enhanced gas sensing in zinc oxide thick films. *Radiation Physics and Chemistry* **238**, 113187 (2026).

66. Kashiwaba Y, Katahira F, Haga K, Sekiguchi T, Watanabe H. Hetero-epitaxial growth of ZnO thin films by atmospheric pressure CVD method. *Journal of Crystal Growth* **221**, 431-434 (2000).

67. Zubiaga A*, et al.* Zinc vacancies in the heteroepitaxy of ZnO on sapphire: Influence of the substrate orientation and layer thickness. *Applied Physics Letters* **86**, (2005).

68. Koida T*, et al.* Correlation between the photoluminescence lifetime and defect density in bulk and epitaxial ZnO. *Applied Physics Letters* **82**, 532-534 (2003).
